# Supplementary material for: Climbing Fiber Burst Size and Olivary Sub-threshold Oscillations in a Network Setting
Source: PubMed Central journal article supplement (PMC3521668; doi:10.1371/journal.pcbi.1002814), 2012-12-13

**A.**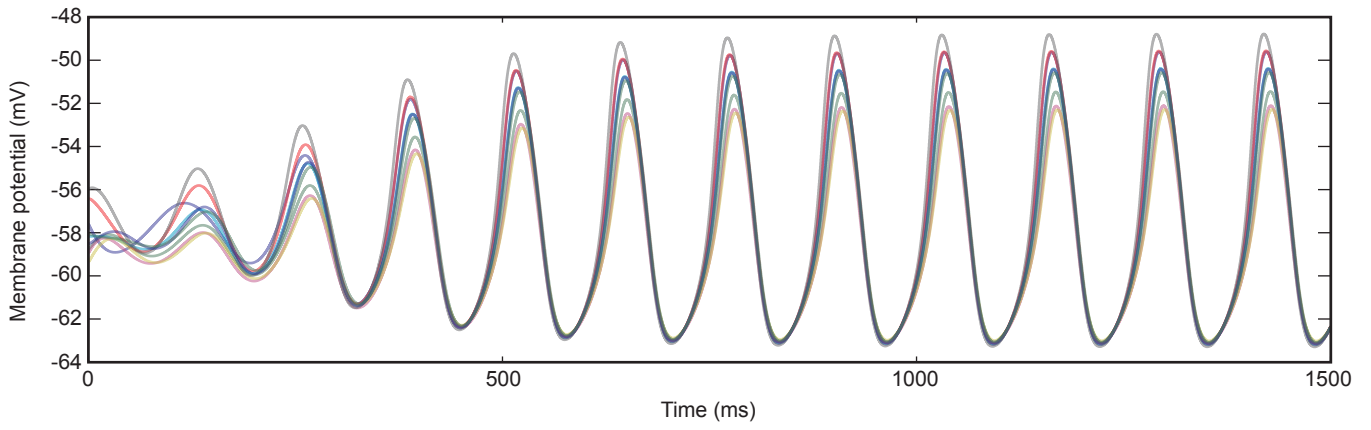**B.**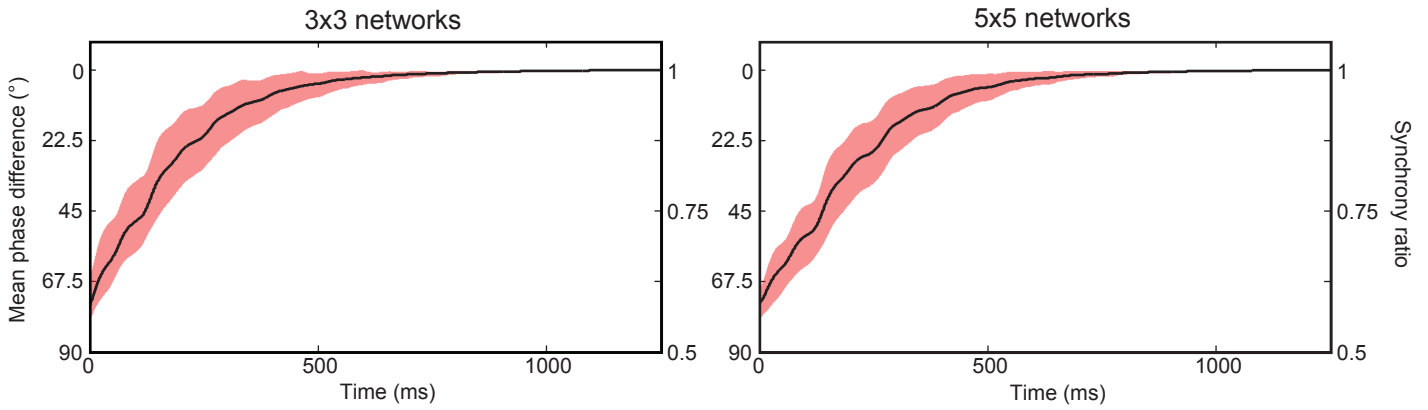**C.**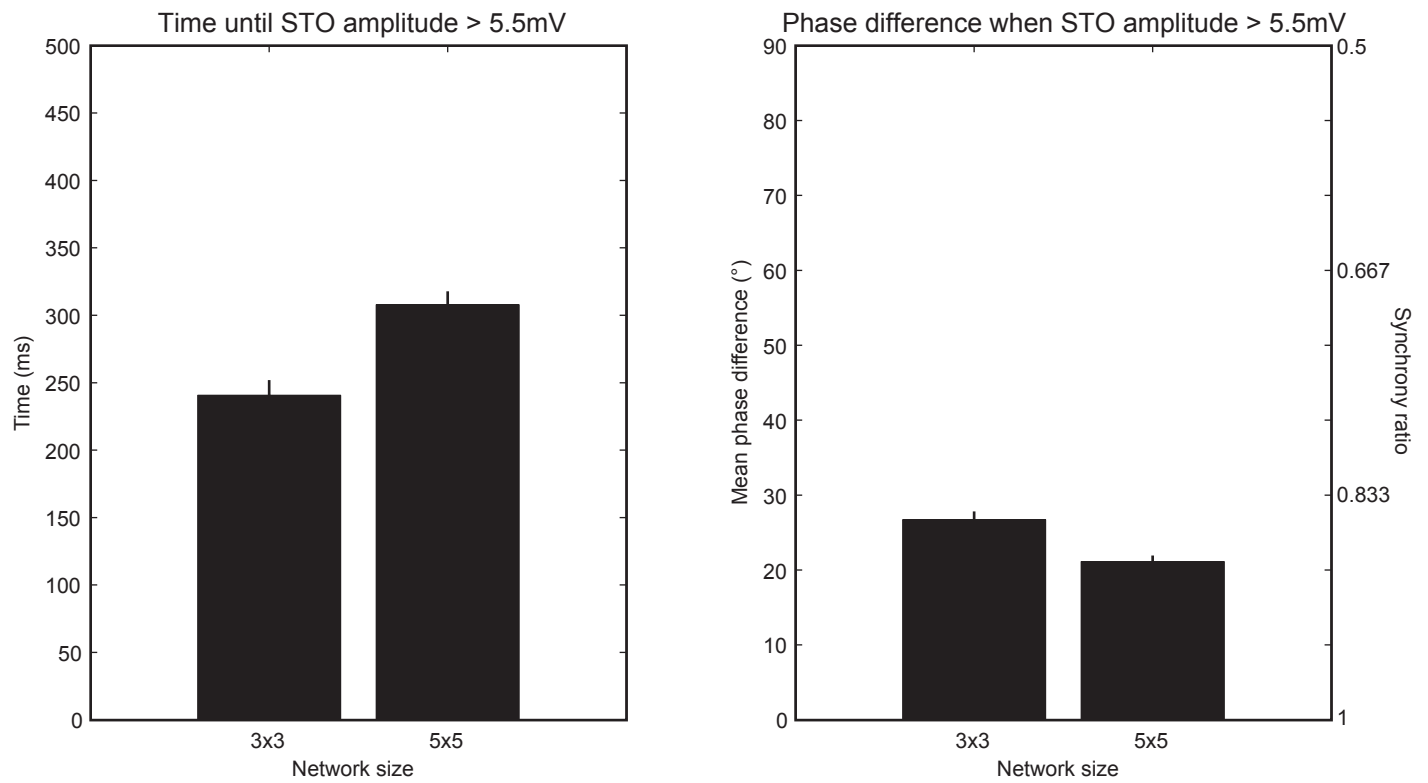

Supplement: pcbi.1002814.s001.pdf [file pcbi.1002814.s001.pdf]
